# Supplementary material
Source: PubMed Central journal article supplement (PMC5043101)
Supplement: ajcr0006-1890-f9.pdf [file ajcr0006-1890-f9.pdf]

## Biological characteristics of SP cells in human HCC

**Supplementary Table 1.** Relative miRNA over and under expression levels in SP cells compared to NSP cells

| Overexpression miRNA            | Fold chang  | Underexpression miRNA | Fold chang  |
|---------------------------------|-------------|-----------------------|-------------|
| hsa-miR-193b-3p                 | 13.57466084 | hsa-miR-200a-3p       | 0.07719342  |
| hsa-miR-16-2-3p                 | 11.47780862 | hsa-miR-4300          | 0.145005846 |
| hsa-miR-4534                    | 9.08514122  | hsa-miR-192-5p        | 0.159719808 |
| hsa-miR-100-5p                  | 7.143027698 | hsa-miR-194-5p        | 0.160584747 |
| hsa-miR-10b-5p                  | 6.310873043 | hsa-miR-4278          | 0.163524047 |
| hsa-miR-505-3p                  | 6.192544174 | hsa-miR-130b-3p       | 0.18297662  |
| hsa-miR-378g                    | 5.233099862 | hsa-miR-625-5p        | 0.199282377 |
| hsa-miR-452-5p                  | 5.212948414 | hsa-miR-519d-3p       | 0.227617082 |
| hsa-miR-30c-1-3p                | 4.630349752 | hsa-miR-125a-3p       | 0.227880183 |
| hsa-miR-711                     | 4.164632636 | hsa-miR-548an         | 0.24151949  |
| hsa-miR-4484                    | 3.854213293 | hsa-miR-320e          | 0.256139137 |
| hsa-miR-3660                    | 3.821604119 | hsa-miR-671-5p        | 0.266510167 |
| hsa-miR-4691-3p                 | 3.577487707 | hsa-miR-410-5p        | 0.268751841 |
| hsa-miR-4441                    | 3.47725102  | hsa-miR-29a-5p        | 0.270733183 |
| hsa-miR-29c-3p                  | 3.472237777 | hsa-miR-935           | 0.281542426 |
| hsa-miR-3687                    | 3.297569776 | hsa-miR-377-5p        | 0.284469442 |
| hsa-miR-3678-3p                 | 3.24535561  | hsa-miR-3168          | 0.287489676 |
| hsa-miR-614                     | 3.103428902 | hsa-miR-193a-5p       | 0.295295852 |
| hsa-miR-190a-5p                 | 3.10118546  | hsa-miR-320d          | 0.29643431  |
| hsa-miR-188-3p                  | 3.042233819 | hsa-miR-29a-3p        | 0.29825148  |
| hsa-miR-505-5p                  | 3.034803271 | hsa-miR-323a-3p       | 0.30054815  |
| hsa-miR-1205                    | 2.946057806 | hsa-miR-3650          | 0.301641052 |
| hsa-miR-3193                    | 2.850559773 | hsa-miR-548j-5p       | 0.304154728 |
| hsa-miR-4451                    | 2.784405236 | hsa-miR-514a-5p       | 0.312182272 |
| hsa-miR-3924                    | 2.666901022 | hsa-miR-4429          | 0.315398292 |
| hsa-miR-365a-3p/hsa-miR-365b-3p | 2.622838246 | hsa-miR-3132          | 0.316941685 |
| hsa-miR-17-3p                   | 2.585948569 | hsa-let-7c-5p         | 0.3281603   |
| hsa-miR-638                     | 2.545096379 | hsa-miR-135a-5p       | 0.329441873 |
| hsa-miR-5187-3p                 | 2.491511846 | hsa-miR-320c          | 0.33470381  |
| hsa-miR-708-5p                  | 2.437994886 | hsa-miR-1293          | 0.345997869 |
| hsa-miR-874-3p                  | 2.424988459 | hsa-miR-222-3p        | 0.351750135 |
| hsa-miR-196a-5p                 | 2.406334701 | hsa-miR-4689          | 0.352831005 |
| hsa-miR-23a-5p                  | 2.348092054 | hsa-miR-4436b-5p      | 0.353509808 |
| hsa-miR-30a-5p                  | 2.322331995 | hsa-miR-25-5p         | 0.359129106 |
| hsa-miR-365b-5p                 | 2.313209138 | hsa-miR-130b-5p       | 0.363086452 |
| hsa-miR-378f                    | 2.311149827 | hsa-miR-7-5p          | 0.365069496 |
| hsa-miR-3607-3p                 | 2.287527279 | hsa-miR-4443          | 0.369798051 |
| hsa-miR-186-5p                  | 2.231394649 | hsa-miR-323b-5p       | 0.371031978 |
| hsa-miR-663b                    | 2.158673905 | hsa-miR-29b-3p        | 0.378771673 |
| hsa-miR-30e-5p                  | 2.130916411 | hsa-miR-361-5p        | 0.379681757 |
| hsa-miR-33a-5p                  | 2.077003916 | hsa-miR-4677-3p       | 0.39316462  |
| hsa-miR-2355-3p                 | 2.051687143 | hsa-miR-320b          | 0.395999646 |
| hsa-miR-618                     | 2.027698185 | hsa-miR-4657          | 0.407521803 |
| hsa-miR-101-3p                  | 2.020048392 | hsa-miR-125b-1-3p     | 0.408866005 |
| hsa-miR-16-1-3p                 | 2.011918433 | hsa-miR-216a-3p       | 0.435433998 |

## Biological characteristics of SP cells in human HCC

|                 |             |
|-----------------|-------------|
| hsa-miR-4717-3p | 0.436585734 |
| hsa-miR-605-5p  | 0.44621064  |
| hsa-miR-335-3p  | 0.446730373 |
| hsa-miR-664b-3p | 0.44887334  |
| hsa-miR-612     | 0.456962456 |
| hsa-miR-4711-3p | 0.457274724 |
| hsa-miR-431-3p  | 0.461691279 |
| hsa-miR-3175    | 0.46633083  |
| hsa-miR-9-5p    | 0.470308882 |
| hsa-miR-4714-5p | 0.471558215 |
| hsa-miR-4483    | 0.478016318 |
| hsa-miR-5681b   | 0.482739428 |
| hsa-miR-221-3p  | 0.490147788 |
| hsa-miR-942-5p  | 0.498031133 |
| hsa-miR-642b-5p | 0.498041789 |
| hsa-miR-126-3p  | 0.498757753 |
| hsa-miR-4709-3p | 0.498840837 |

---

## Biological characteristics of SP cells in human HCC

**Supplementary Table 2.** GO analysis for hsa-miR-193b-3p and hsa-miR-505-3p

| miRNAs          | GO terms                                                                |
|-----------------|-------------------------------------------------------------------------|
| hsa-mir-193b-3p | Response to external stimulus                                           |
|                 | Regulation of biological process                                        |
|                 | Regulation of cellular process                                          |
|                 | Biological regulation                                                   |
| hsa-mir-505-3p  | Mitotic cell cycle                                                      |
|                 | Transcription, DNA-dependent                                            |
|                 | Regulation of transcription, DNA-dependent                              |
|                 | Regulation of transcription from RNA polymerase II promoter             |
|                 | Transcription from RNA polymerase II promoter                           |
|                 | Cell cycle                                                              |
|                 | Biosynthetic process                                                    |
|                 | Macromolecule biosynthetic process                                      |
|                 | Regulation of biosynthetic process                                      |
|                 | Positive regulation of biosynthetic process                             |
|                 | Positive regulation of metabolic process                                |
|                 | Regulation of gene expression                                           |
|                 | Regulation of macromolecule biosynthetic process                        |
|                 | Positive regulation of macromolecule biosynthetic process               |
|                 | Positive regulation of macromolecule metabolic process                  |
|                 | Positive regulation of gene expression                                  |
|                 | Regulation of metabolic process                                         |
|                 | Cell cycle process                                                      |
|                 | Cell cycle phase                                                        |
|                 | Positive regulation of cellular metabolic process                       |
|                 | Regulation of cellular biosynthetic process                             |
|                 | Positive regulation of cellular biosynthetic process                    |
|                 | RNA biosynthetic process                                                |
|                 | Cellular macromolecule biosynthetic process                             |
|                 | Cellular biosynthetic process                                           |
|                 | Cellular macromolecule metabolic process                                |
|                 | Positive regulation of transcription, DNA-dependent                     |
|                 | Positive regulation of nucleobase-containing compound metabolic process |
|                 | Positive regulation of biological process                               |
|                 | Negative regulation of biological process                               |
|                 | Positive regulation of cellular process                                 |
|                 | Regulation of biological process                                        |
|                 | Regulation of cellular process                                          |
|                 | Positive regulation of nitrogen compound metabolic process              |
|                 | Regulation of RNA metabolic process                                     |
|                 | Positive regulation of RNA metabolic process                            |
|                 | Regulation of cell cycle                                                |
|                 | Regulation of macromolecule metabolic process                           |
|                 | Biological regulation                                                   |
|                 | Regulation of primary metabolic process                                 |
|                 | Regulation of cellular macromolecule biosynthetic process               |
|                 | Regulation of RNA biosynthetic process                                  |

## Biological characteristics of SP cells in human HCC

**Supplementary Table 3.** Go analysis for hsa-miR-200a-3p, hsa-miR-194-5p and hsa-miR-130b-3p

| miRNAs                                      | GO terms                                                             |
|---------------------------------------------|----------------------------------------------------------------------|
| hsa-mir-130b-3p                             | Angiogenesis                                                         |
|                                             | Blood vessel development                                             |
|                                             | Vasculature development                                              |
|                                             | Metabolic process                                                    |
|                                             | Cellular process                                                     |
|                                             | Cellular metabolic process                                           |
|                                             | Primary metabolic process                                            |
|                                             | Regulation of biological process                                     |
|                                             | Regulation of cellular process                                       |
|                                             | Biological regulation                                                |
| hsa-mir-194-5p                              | Metabolic process                                                    |
|                                             | Cellular process                                                     |
|                                             | Cellular metabolic process                                           |
|                                             | Primary metabolic process                                            |
|                                             | Regulation of biological process                                     |
|                                             | Regulation of cellular process                                       |
| hsa-mir-200a-3p                             | Negative regulation of transcription from RNA polymerase II promoter |
|                                             | Cell morphogenesis                                                   |
|                                             | Cell morphogenesis involved in differentiation                       |
|                                             | Eye development                                                      |
|                                             | In utero embryonic development                                       |
|                                             | Morphogenesis of an epithelium                                       |
|                                             | Regionalization                                                      |
|                                             | Nucleobase-containing compound metabolic process                     |
|                                             | Chromatin organization                                               |
|                                             | Transcription, DNA-dependent                                         |
|                                             | Regulation of transcription, DNA-dependent                           |
|                                             | Regulation of transcription from RNA polymerase II promoter          |
|                                             | Transcription from RNA polymerase II promoter                        |
|                                             | Nitrogen compound metabolic process                                  |
|                                             | Cell cycle                                                           |
|                                             | Pattern specification process                                        |
|                                             | Brain development                                                    |
|                                             | Sensory organ development                                            |
|                                             | Heart development                                                    |
|                                             | Muscle organ development                                             |
|                                             | Metabolic process                                                    |
|                                             | Cell proliferation                                                   |
|                                             | Biosynthetic process                                                 |
|                                             | Macromolecule biosynthetic process                                   |
|                                             | Embryo development ending in birth or egg hatching                   |
|                                             | Organ morphogenesis                                                  |
|                                             | Tissue development                                                   |
| Regulation of biosynthetic process          |                                                                      |
| Positive regulation of biosynthetic process |                                                                      |
| Negative regulation of metabolic process    |                                                                      |

## Biological characteristics of SP cells in human HCC

Positive regulation of metabolic process  
Anterior/posterior pattern specification  
Regulation of signal transduction  
Positive regulation of signal transduction  
Cellular process  
Gene expression  
Regulation of gene expression  
Regulation of macromolecule biosynthetic process  
Positive regulation of macromolecule biosynthetic process  
Negative regulation of macromolecule biosynthetic process  
Positive regulation of macromolecule metabolic process  
Negative regulation of macromolecule metabolic process  
Positive regulation of gene expression  
Negative regulation of gene expression  
Regulation of cell communication  
Positive regulation of cell communication  
Striated muscle tissue development  
RNA metabolic process  
Chromatin modification  
Regulation of nucleobase-containing compound metabolic process  
Positive regulation of signaling  
Regulation of cellular metabolic process  
Positive regulation of cellular metabolic process  
Regulation of cellular biosynthetic process  
Positive regulation of cellular biosynthetic process  
Multicellular organism reproduction  
RNA biosynthetic process  
Cellular component morphogenesis  
Cellular nitrogen compound metabolic process  
Cellular macromolecule biosynthetic process  
Cardiac cell differentiation  
Regulation of growth  
Locomotion  
Muscle cell differentiation  
Chordate embryonic development  
Camera-type eye development  
Macromolecule metabolic process  
Cellular metabolic process  
Primary metabolic process  
Cellular biosynthetic process  
Cellular macromolecule metabolic process  
Regulation of cell differentiation  
Negative regulation of transcription, DNA-dependent  
Positive regulation of transcription, DNA-dependent  
Negative regulation of nucleobase-containing compound metabolic process  
Positive regulation of nucleobase-containing compound metabolic process  
Positive regulation of transcription from RNA polymerase II promoter  
Positive regulation of biological process  
Negative regulation of biological process

## Biological characteristics of SP cells in human HCC

Positive regulation of cellular process  
Negative regulation of cellular process  
Multicellular organismal reproductive process  
Gland development  
Cardiac muscle tissue development  
Regulation of biological process  
Regulation of developmental process  
Regulation of cellular process  
Regulation of cellular component organization  
Striated muscle cell differentiation  
Regulation of nitrogen compound metabolic process  
Negative regulation of nitrogen compound metabolic process  
Positive regulation of nitrogen compound metabolic process  
Regulation of RNA metabolic process  
Negative regulation of RNA metabolic process  
Positive regulation of RNA metabolic process  
Regulation of cell cycle  
Regulation of macromolecule metabolic process  
Epithelium development  
Muscle tissue development  
Epithelial tube morphogenesis  
Muscle structure development  
Biological regulation  
Cardiovascular system development  
Circulatory system development  
Regulation of primary metabolic process  
Nucleic acid metabolic process  
Regulation of cellular macromolecule biosynthetic process  
Negative regulation of cellular macromolecule biosynthetic process  
Regulation of RNA biosynthetic process

---
